# Supplementary material for: Dual-colour (near-infrared/visible) emitting annexin V for fluorescence imaging of tumour cell apoptosis in vitro and in vivo
Source: Royal Society of Chemistry journal article supplement (doi:10.1039/d0ra06495e), 2020-01-01
Supplement: d0ra06495e1.pdf [file d0ra06495e1.pdf]

Electronic Supplementary Information

**Dual-colour (near-infrared/visible) emitting annexin V for fluorescence imaging of tumour cell apoptosis *in vitro* and *in vivo***

Setsuko Tsuboi and Takashi Jin

RIKEN Center for Biosystems Dynamic Research (BDR), Furuedai 6-2-3, Suita, Osaka 565-0874, Japan. E-mail: [tjin@riken.jp](mailto:tjin@riken.jp)

**Supplementary data**

**Fig. S1**

Structure of pRSET-Annexin V, pRSET-EGFP-Annexin V, pRSET-mPlum-Annexin V plasmids.

**Fig. S2**

SDS PAGE of Annexin V, ICG-Annexin V, ICG-EGFP-Annexin V and ICG-mPlum-Annexin V.

**Fig. S3**

Absorption spectra of EGFP and mPlum before and after labelling with ICG-NHS.

**Fig. S4**

Changes in the fluorescence intensities of ICG, EGFP and mPlum emissions.

**Fig. S5**

Flow cytometric analysis and microscopy imaging of KPL-4 cells treated with Kadcycla.

**Fig. S6**

Blocking experiments for apoptosis-induced KPL-4 cells.

**Fig. S7**

Bright field (BF) and NIR fluorescence images of breast tumour-bearing mice injected with ICG-EGFP-Annexin V.

**Fig. S8**

Bright field (BF) and VIS/NIR dual-colour fluorescence images of breast tumour-bearing mice.

**Fig. S9**

Bright field (BF) and NIR fluorescence images of breast tumour-bearing mice injected with ICG-Annexin V.

**Fig. S10**

NIR fluorescence image of breast tumour-bearing mice injected with ICG-EGFP and ICG-mPlum.

**Table S1**

Optical properties of ICG-Annexin V, ICG-EGFP-Annexin V, and ICG-mPlum-Annexin V.

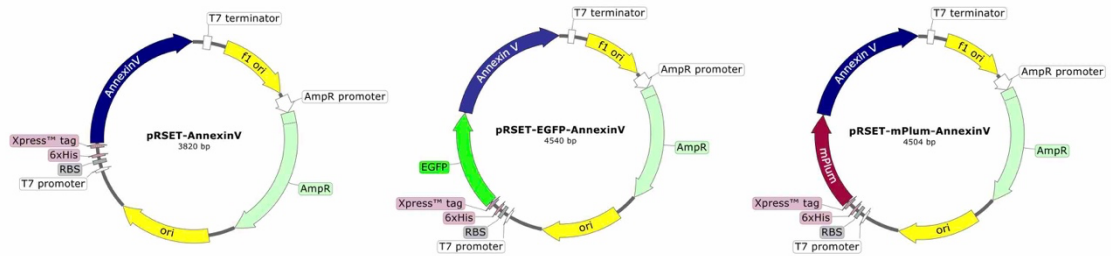

**Fig. S1** Structure of pRSET-Annexin V, pRSET-EGFP-Annexin V, and pRSET-mPlum-Annexin V plasmids.

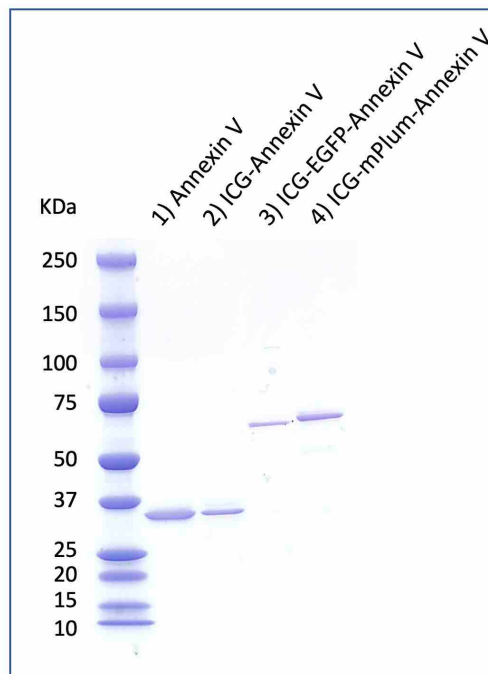

**Fig. S2** SDS PAGE of annexin V, ICG-Annexin V, ICG-EGFP-Annexin V and ICG-mPlum-Annexin V.

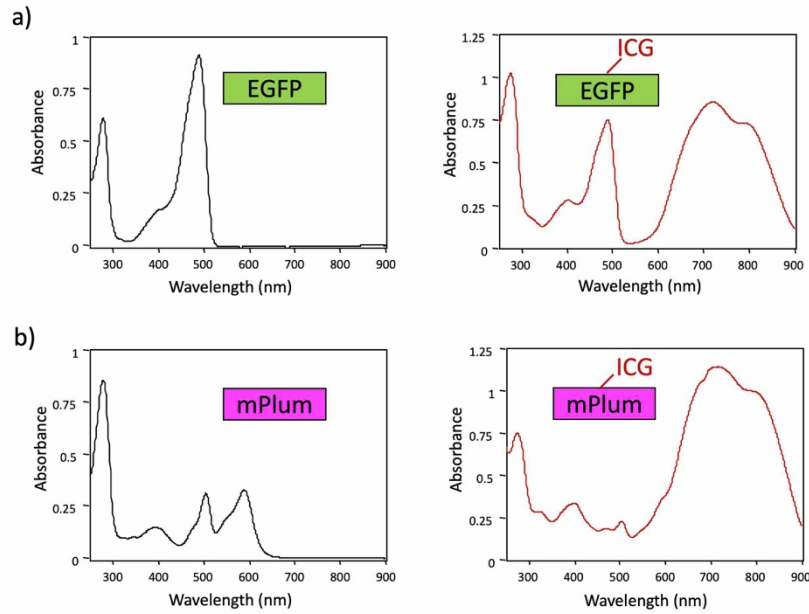

**Fig. S3** Absorption spectra of EGFP and mPlum before and after labelling with ICG-NHS.

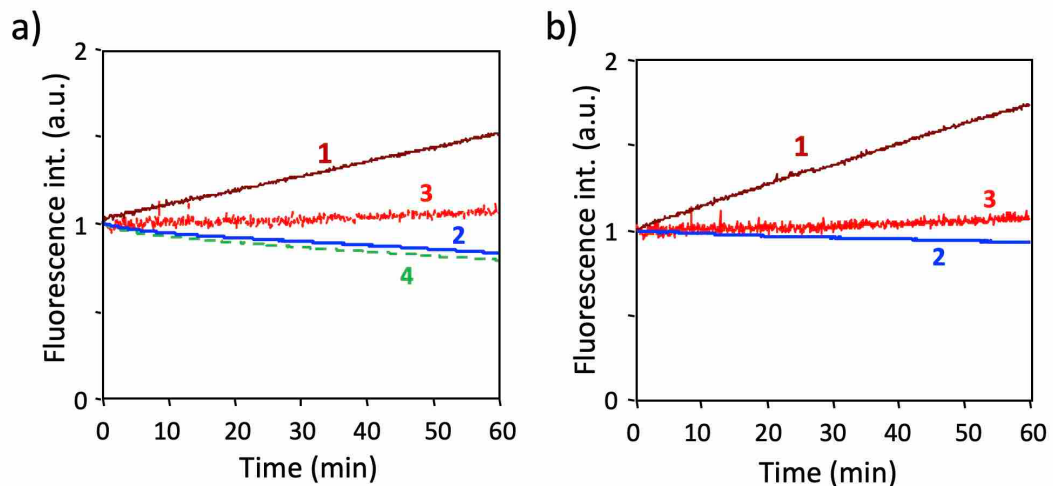

**Fig. S4** Changes in the fluorescence intensities of ICG, EGFP and mPlum emissions in ICG-EGFP-Annexin V and ICG-mPlum-Annexin V by irradiation of excitation lights at 480 nm, 550 nm, and 780 nm ( $3 \text{ mW/cm}^2$ ): a) ICG-EGFP-Annexin V, 1: ICG emission (ex:780 nm, em 830 nm), 2: EGFP emission (ex:480 nm, em:515 nm); b) ICG-mPlum-Annexin V, 1: ICG emission (ex:780 nm, em: 830 nm), 2: mPlum emission (ex:550 nm, em: 670 nm). For comparison, fluorescence stability of ICG emission (3: red line, ex:780 nm, em 830 nm) in ICG-Annexin V and FITC emission (4: green line, ex:480 nm, em:515 nm) in FITC-Annexin V was also examined. The concentration of probes was  $0.75 \mu\text{M}$ .

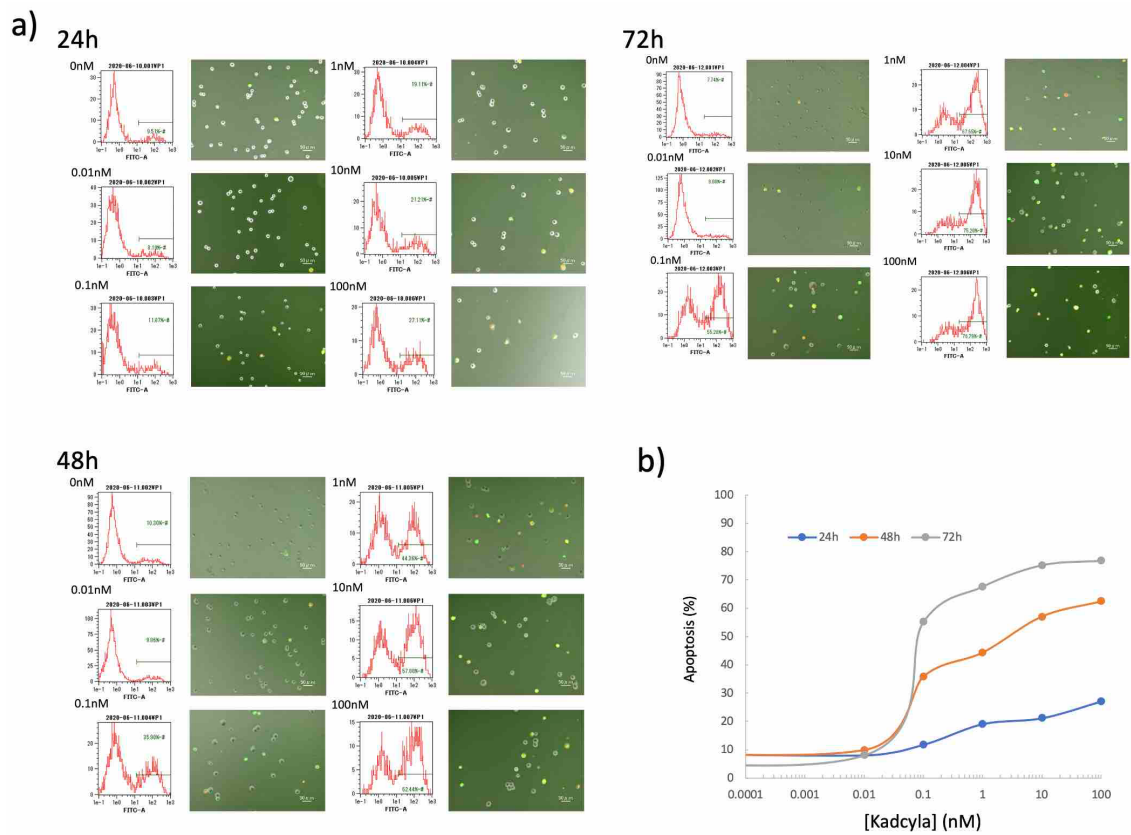

**Fig. S5** a) Flow cytometric analysis and microscopy imaging of KPL-4 cells treated with Kadcylya (0-100 nM) for 24, 48, and 72h. Microscopy images merged a bright filed and fluorescence image. Green and red colours show the fluorescence from FITC-Annexin V and propidium iodide (PI), respectively. b) The graph shows the apoptosis (%) of KPL-cells treated with Kadcylya.

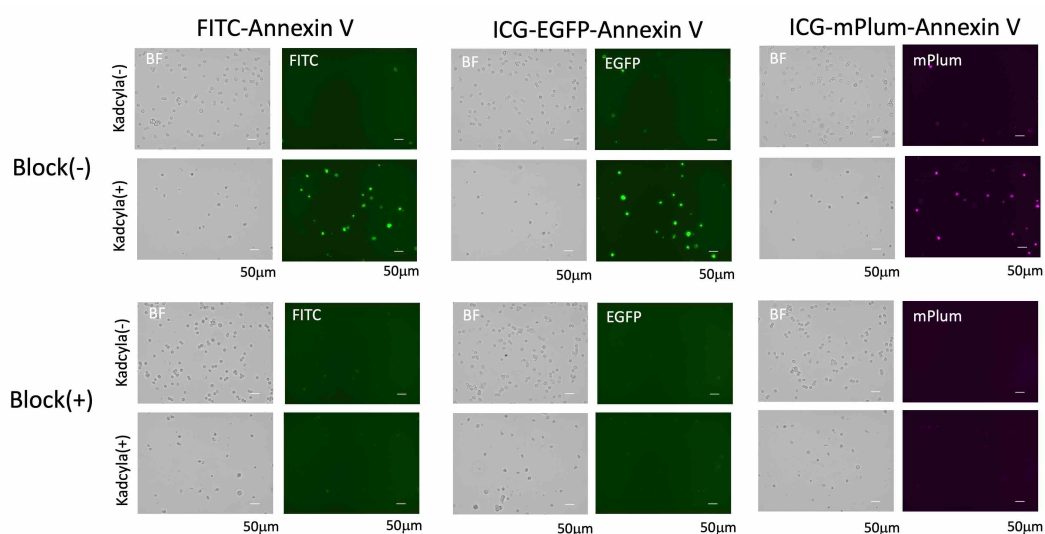

**Fig. S6** Blocking experiments using unlabelled annexin V for apoptosis-induced KPL-4 cells. Cellular imaging was performed three days after the treatment of Kadcyla. Cells were stained with FITC-Annexin V (5 μL ; FITC-Annexin V Apoptosis Detection Kit, Nacalai Tesque), ICG-EGFP-Annexin V (0.7 μM) or ICG-mPlum-Annexin V (0.7 μM). As a blocking control, cell suspensions were preincubated with unlabeled recombinant annexin V (final concentration 4 μM) for 15 minutes prior to staining with the fluorescent probes.

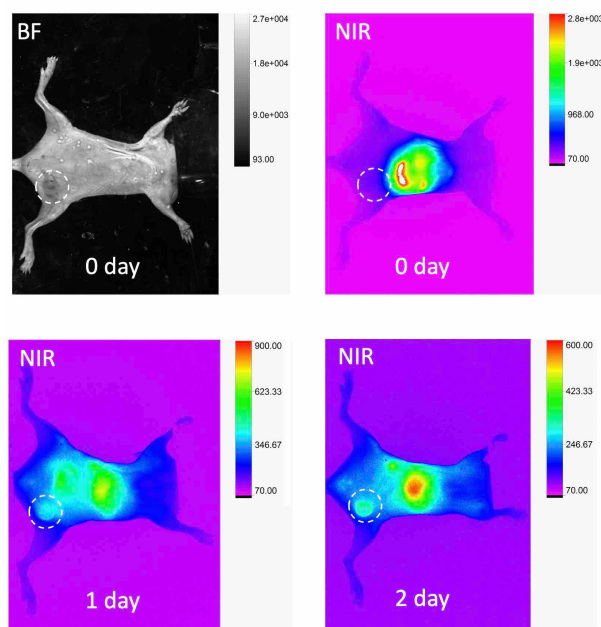

**Fig. S7** Bright field and NIR fluorescence images of breast tumour-bearing mice treated with Kadcyla (0.2 mg). Two hundred μL of Kadcyla (1mg/mL) was intravenously injected *via* a tail vein of the mouse. ICG-EGFP-Annexin V was injected to the mouse three days after the injection of Kadcyla. NIR fluorescence images (em: 830 ± 20 nm) were taken 0, 1, and 2 days after the injection of ICG-EGFP-Annexin V. The dotted circles show the position of breast tumours in the mice.

a) ICG-EGFP-Annexin V

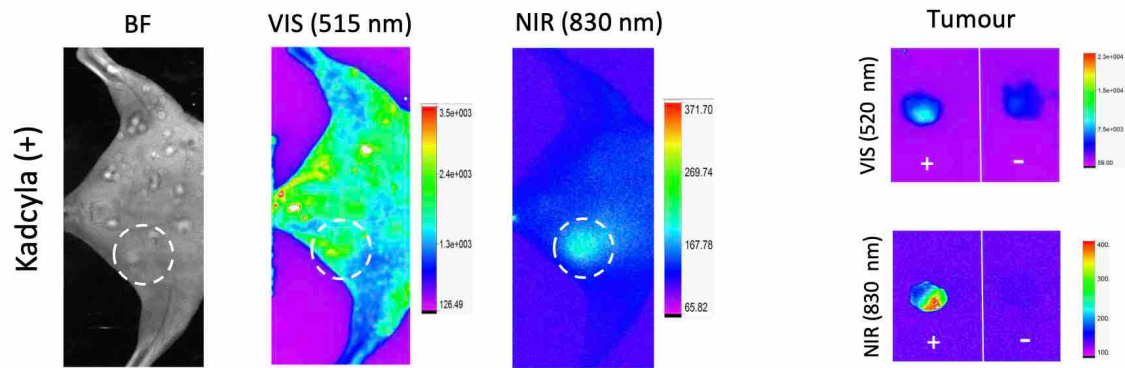

b) ICG-mPlum-Annexin V

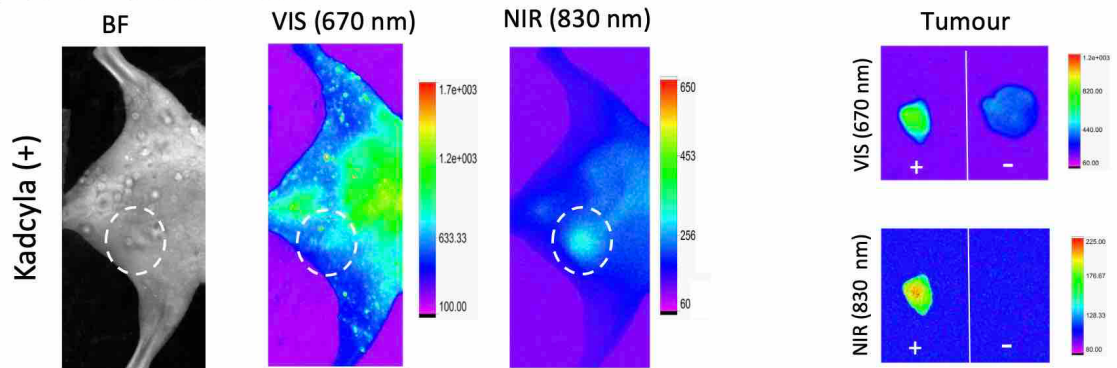

**Fig. S8** Bright filed (BF) and VIS/NIR dual-colour fluorescence images of breast tumour-bearing mice: a) ICG-EGFP-Annexin V injected mouse and b) ICG-mPlum-Annexin V injected mouse. VIS fluorescence images were taken at  $515 \pm 20$  nm for EGFP emission and  $670 \pm 20$  nm for mPlum emission. NIR fluorescence images were taken at  $830 \pm 20$  nm. Tumour apoptosis was induced by the injection of 200  $\mu$ L of Kadcyla (1mg/mL). Three days after the injection of Kadcyla, ICG-EGFP-Annexin V (or ICG-mPlum-Annexin V) was injected to the Kadcyla treated mouse. Images were taken three days after the injection of the apoptosis probe. The dotted circles show the position of breast tumours in the mice. *Ex vivo* images show VIS and NIR fluorescence images of isolated the breast tumours. Control images (-) were taken for the tumours injected by no Kadcyla and probes.

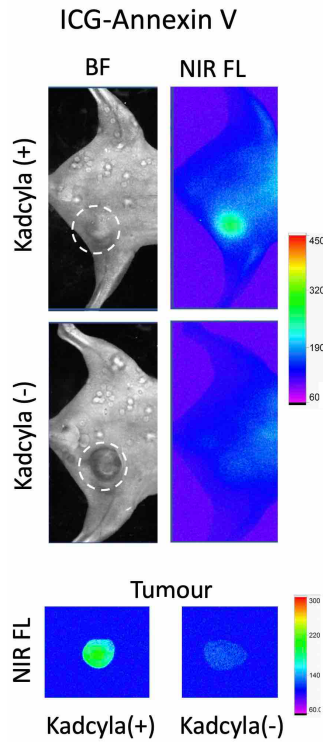

**Fig. S9** Bright field (BF) and NIR fluorescence images of breast tumour-bearing mice treated with and without Kadcylyla. Two hundred  $\mu\text{L}$  of Kadcylyla (1mg/mL) was intravenously injected *via* a tail vein of the mouse. ICG-Annexin V was injected to the mouse three days after the injection of Kadcylyla. NIR fluorescence images (em:  $830 \pm 20$  nm) were taken three days after the injection of ICG-Annexin V. The dotted circles show the position of breast tumours in the mice. The *ex vivo* images show the NIR fluorescence images of isolated the breast tumours.

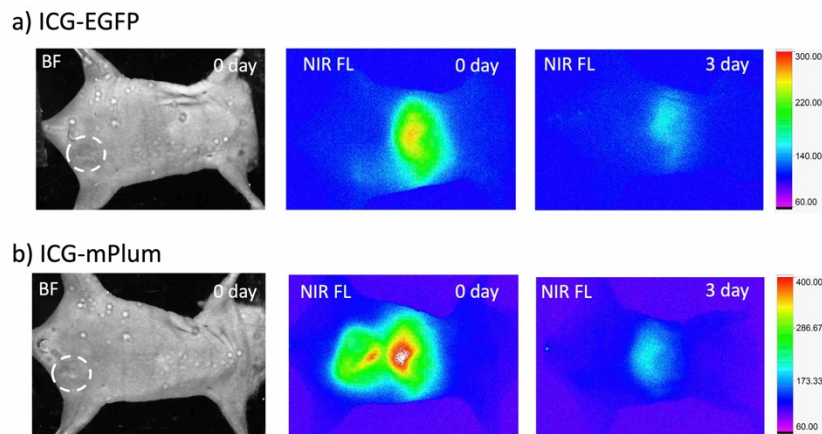

**Fig. S10** NIR fluorescence image of breast tumour-bearing mice injected with ICG-EGFP (200  $\mu\text{L}$ , 1 mg/mL) or ICG-mPlum (200  $\mu\text{L}$ , 1mg/mL). Fluorescent probes were injected to the mice *via* their tail veins. NIR fluorescence was observed at  $830 \pm 20$  nm. The dotted circles show the positions of breast tumours in the mice.

**Table S1** Optical properties of ICG-Annexin V, ICG-EGFP-Annexin V, and ICG-mPlum-Annexin V.

|                     | M. W. *  | $\epsilon$ (280 nm) | Ex <sub>max</sub> / Em <sub>max</sub> (nm) | QY (%) |
|---------------------|----------|---------------------|--------------------------------------------|--------|
| ICG-Annexin V       | 41.4 kDa | 31,000              | 800/820 (ICG)                              | ~1     |
| ICG-EGFP-Annexin V  | 68.3 kDa | 42,000              | 490/515 (EGFP)                             | 35     |
|                     |          |                     | 800/820 (ICG)                              | ~ 1    |
| ICG-mPlum-Annexin V | 67.1 kDa | 59,000              | 590/640 (mPlum)                            | 7      |
|                     |          |                     | 800/820 (ICG)                              | ~ 1    |

\* Calculated by assuming that the labeling ratio of ICG per protein is 2.
